# Supplementary material for: Boosting the fill factor and open-circuit voltage of carbon-based perovskite solar cells with a graphene co-doped P3HT/NiOx hole-transporting bilayer
Source: Royal Society of Chemistry journal article supplement (doi:10.1039/d3tc04665f), 2024-01-01
Supplement: d3tc04665f1.pdf [file d3tc04665f1.pdf]

## Supporting Information

### **Boosting fill factor and open-circuit voltage of carbon-based perovskite solar cells with graphene co-doped P3HT/NiO<sub>x</sub> hole-transporting bilayer**

Yuhao Song,‡ Bingjie Xu,‡ Yingying Deng, Miaosen Yao, Junjie Tong, Qichao Wang, Wanlong Wang, Gentian Yue, Weifeng Zhang, Chen Dong,\* and Furui Tan\*

Key Laboratory of Photovoltaic Materials, School of Future Technology, Henan University, Kaifeng, 475004, PR China.

Corresponding authors.

E-mail address: \*Chen Dong, [phydongchen@163.com](mailto:phydongchen@163.com); \*Furui Tan, [frtan@henu.edu.cn](mailto:frtan@henu.edu.cn);

‡These authors contributed equally to this work.

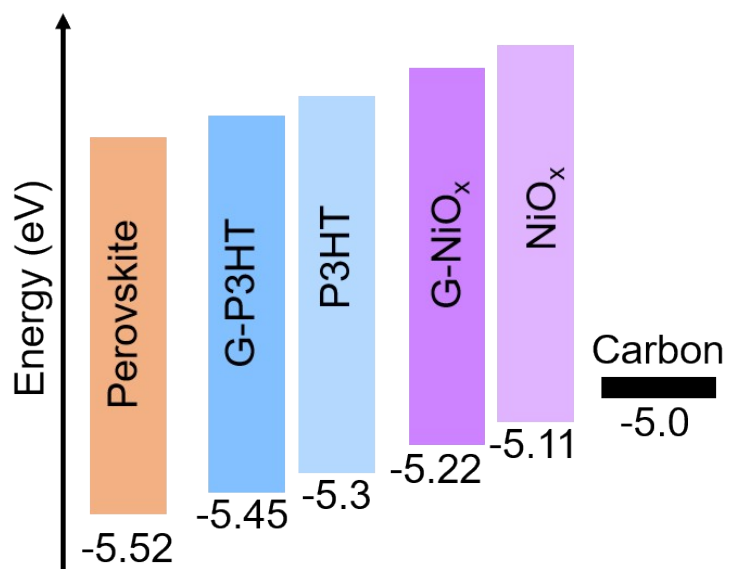

**Figure S1.** Energy level diagrams of perovskite, G-P3HT, P3HT, G-NiO<sub>x</sub>, NiO<sub>x</sub>, and carbon electrode, wherein the HOMO value of pristine P3HT and the VBM value of NiO<sub>x</sub> are reproduced from our previous work (*Adv. Funct. Mater.*, 2023, 33, 2301920).

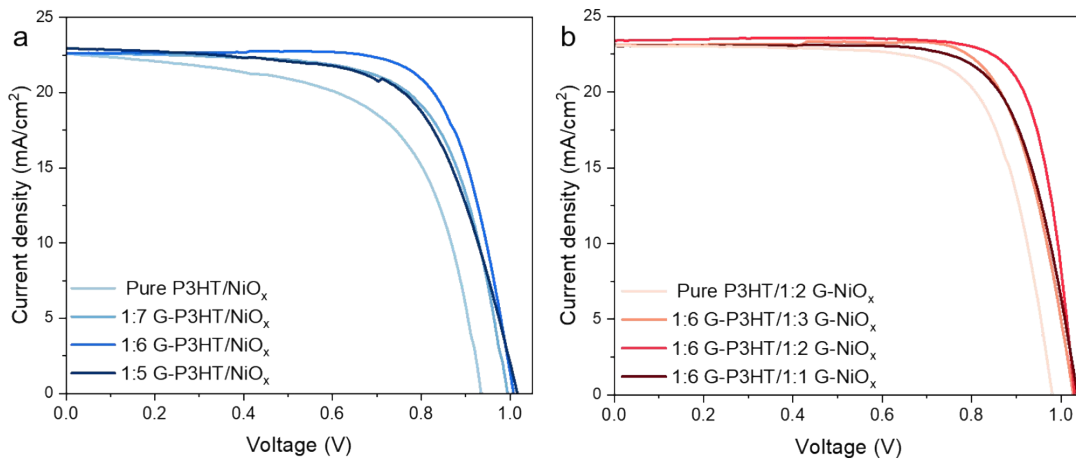

**Figure S2.** J-V curves of C-PSCs with (a) different graphene-doped P3HT and (b) different graphene-doped NiO<sub>x</sub> HTLs. It can be found in Figure S2a that doping graphene into P3HT can significantly improve the device performance, especially  $V_{oc}$  and FF. The optimal volume ratio of graphene and P3HT solution is 1: 6. This improvement is mainly attributed the increased conductivity and decreased HOMO level of P3HT by graphene doping. Based on this result, we further explore the effect of graphene concentration in NiO<sub>x</sub> on C-PSC performance, as shown in Figure S2b. It is obvious that graphene doping in NiO<sub>x</sub> also increases the device efficiency, mainly FF, which is due to the enhanced electricity contact between carbon electrode and G-NiO<sub>x</sub>. With the volume ratio of 1: 2 between graphene and NiO<sub>x</sub> solution, the resultant G-P3HT/G-NiO<sub>x</sub> devices yield the highest efficiency of 19.1%.

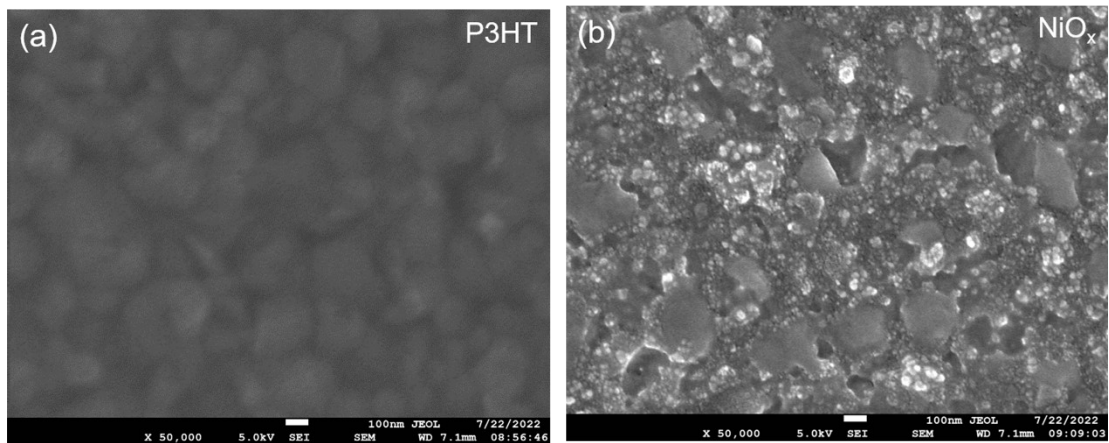

**Figure S3.** Top-view SEM image of pristine (a) P3HT and (b) NiO<sub>x</sub> films.

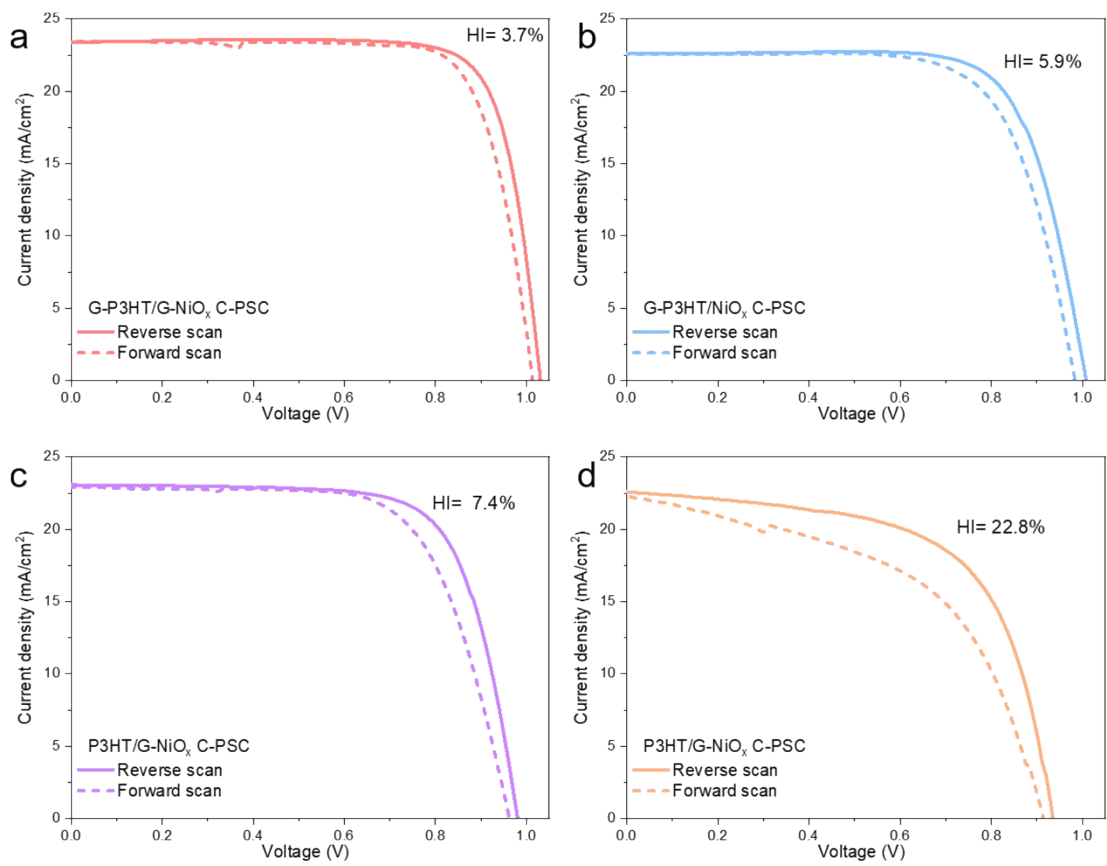

**Figure S4.** Hysteresis behavior of the C-PSCs with P3HT/NiO<sub>x</sub>, P3HT/G-NiO<sub>x</sub>, G-P3HT/NiO<sub>x</sub>, and G-P3HT/G-NiO<sub>x</sub> bilayers-HTLs.

**Table S1.** Fitting parameters of the TRPL spectra for the perovskite films modified with P3HT/NiO<sub>x</sub> and G-P3HT/G-NiO<sub>x</sub> bilayer HTLs.

| Samples                              | A <sub>1</sub> (%) | τ <sub>1</sub> (ns) | A <sub>2</sub> (%) | τ <sub>2</sub> (ns) | τ <sub>average</sub> (ns) |
|--------------------------------------|--------------------|---------------------|--------------------|---------------------|---------------------------|
| Perovskite                           | 49.78              | 51.30               | 146.14             | 197.43              | 185.54                    |
| Perovskite/P3HT/NiO <sub>x</sub>     | 2.18               | 0.82                | 63.11              | 114.59              | 114.56                    |
| Perovskite/G-P3HT/G-NiO <sub>x</sub> | 9.05               | 0.75                | 19.79              | 44.47               | 44.13                     |
